# Supplementary material for: Novel Insights into the Role of UBE3A in Regulating Apoptosis and Proliferation
Source: MDPI journal article supplement (doi:10.3390/jcm9051573), 2020-05-22

Supplementary Figure S1

E13.5

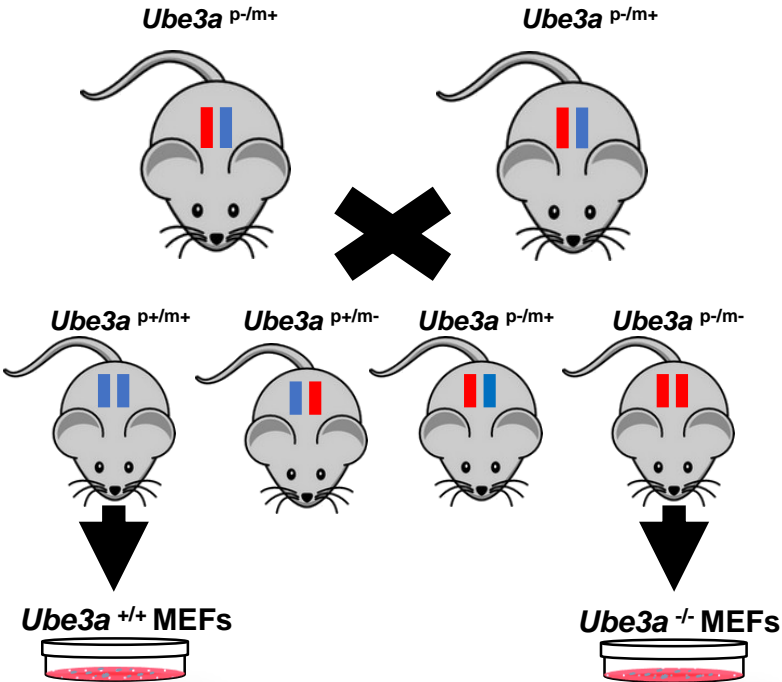

Supplementary Figure S2

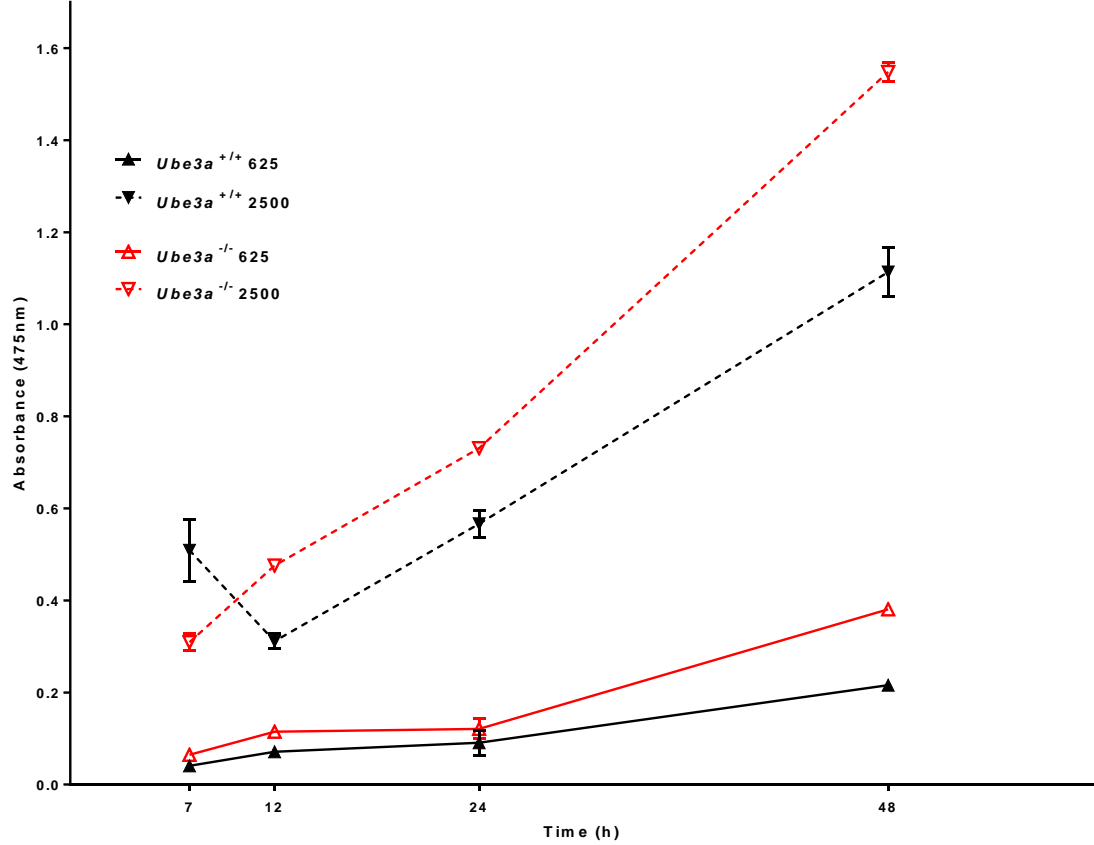

Supplementary Figure S3

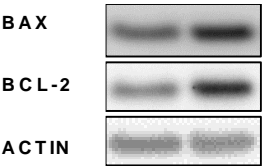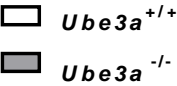

BAX/ACTIN

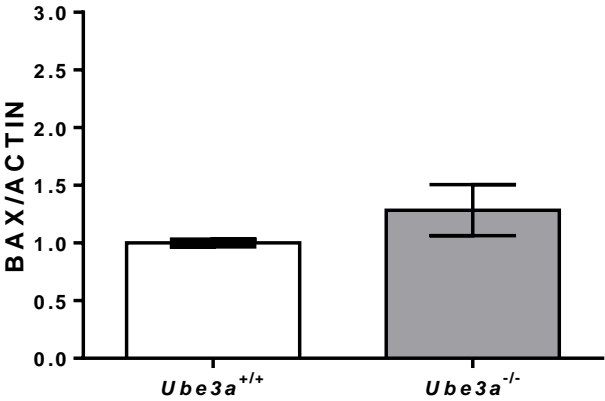

BCL-2/ACTIN

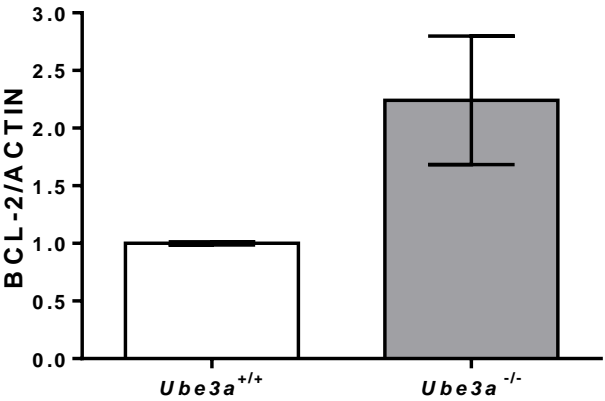

## Supplementary Figure S4

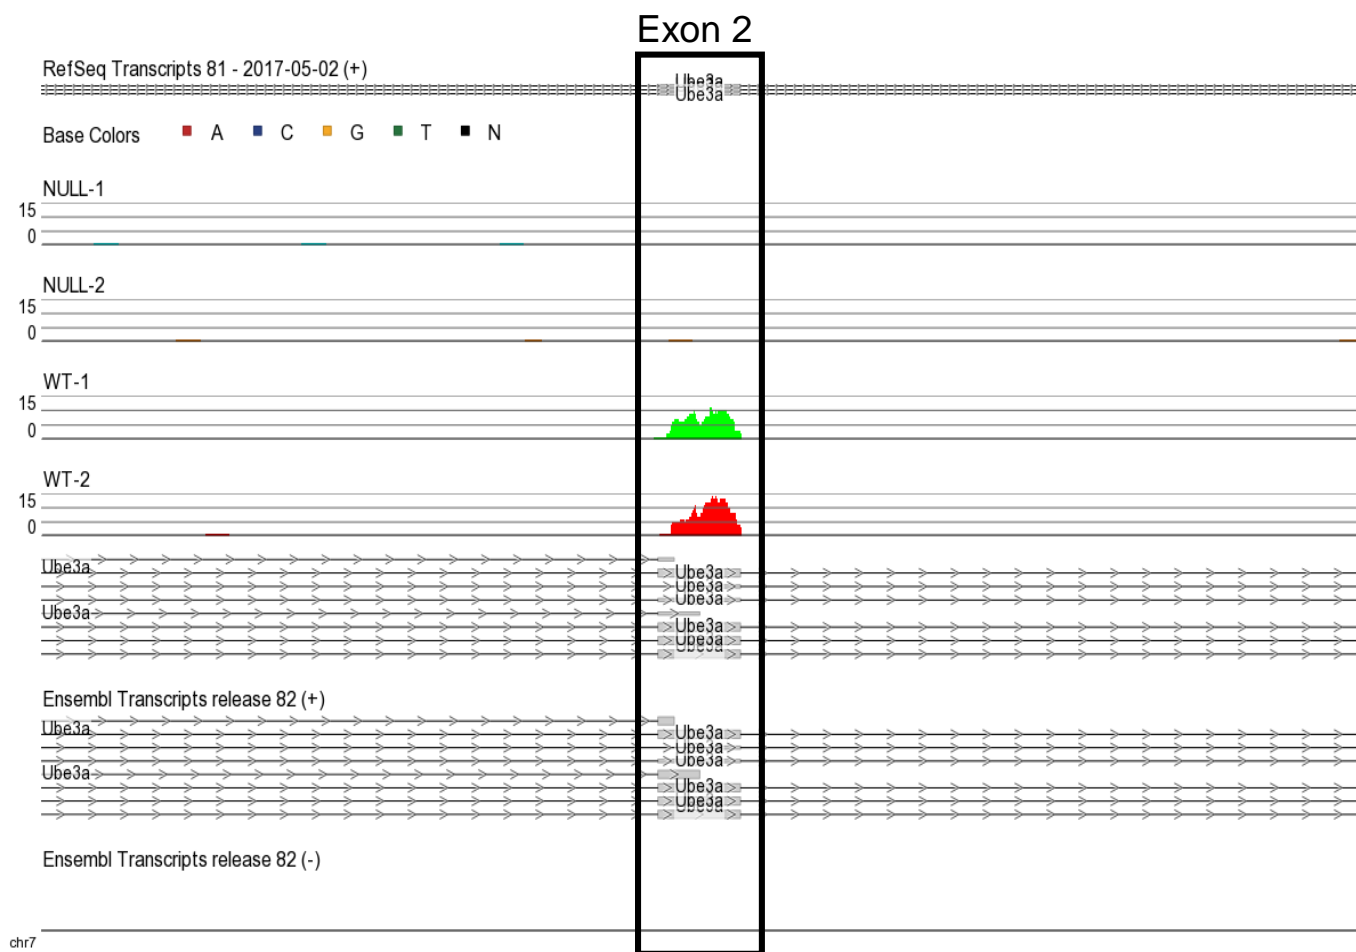

# Supplementary Figure S5

A. **Kdmd5** gene expression profile

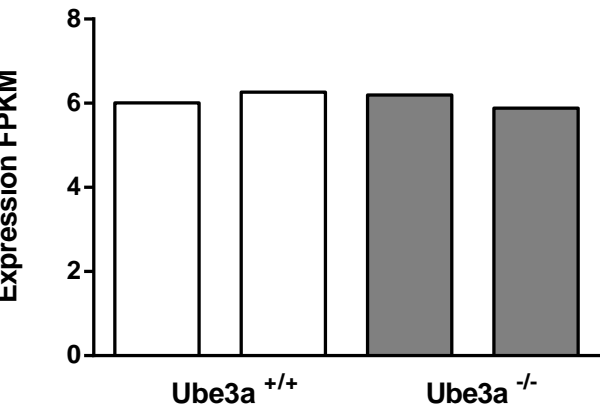

B. **Ddx3y** gene expression profile

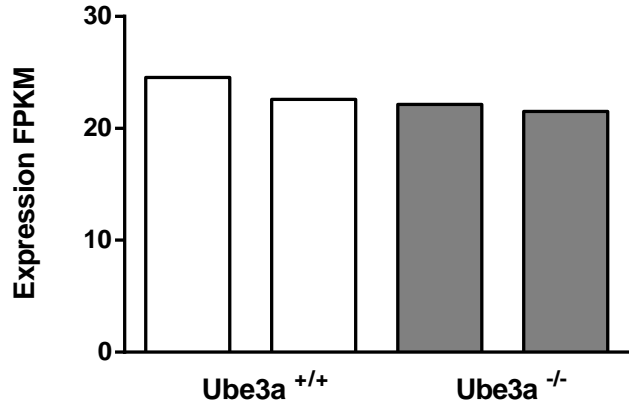

Supplementary Figure S6

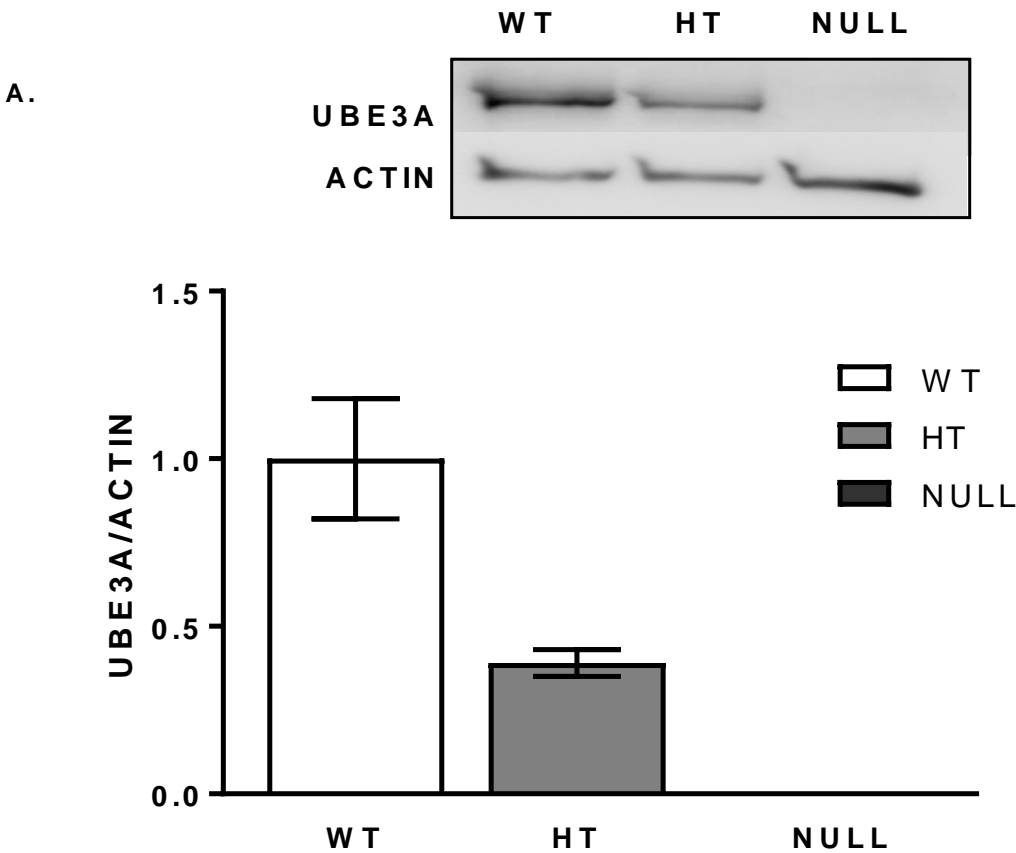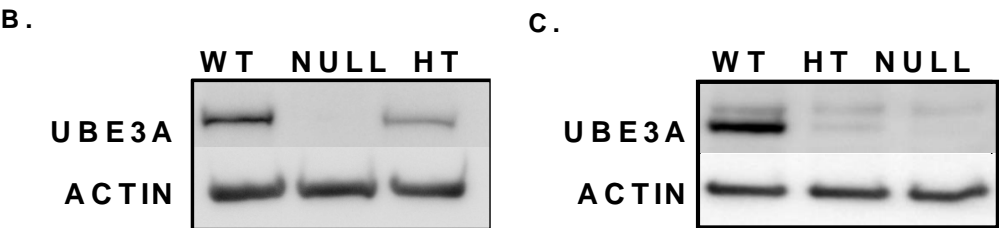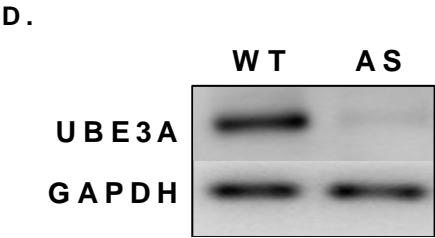

Supplement: s1 [file s1]
